# Supplementary material for: Dopants modulate crystal growth in molten salts enabled by surface energy tuning
Source: Royal Society of Chemistry journal article supplement (doi:10.1039/d1ta02351a), 2021-01-01
Supplement: d1ta02351a1.pdf [file d1ta02351a1.pdf]

## Supplementary Information

for

### Dopants Modulate Crystal Growth in Molten Salts Enabled by Surface Energy Tuning

Xiaoqiao Li,<sup>1, 2, †</sup> Linming Zhou,<sup>3, †</sup> Han Wang,<sup>2</sup> Dechao Meng,<sup>2</sup> Guannan Qian,<sup>2</sup> Yong Wang,<sup>2</sup> Yushi He,<sup>2</sup> Yongjun Wu,<sup>3</sup> Zijian Hong,<sup>3,\*</sup> Zi-Feng Ma,<sup>2</sup> Linsen Li<sup>2, 4, \*</sup>

<sup>1</sup> College of Environmental & Chemical Engineering, Shanghai University of Electric Power; Shanghai 200090, China

<sup>2</sup> Department of Chemical Engineering, Shanghai Jiao Tong University; Shanghai 200240, China

<sup>3</sup> School of Materials Science & Engineering, Zhejiang University; Hangzhou 310027, China

<sup>4</sup> Shanghai Jiao Tong University Sichuan Research Institute, Chengdu 610213, China

† These authors contributed equally to this work.

\*Corresponding authors: Zijian Hong ([hongzijian100@zju.edu.cn](mailto:hongzijian100@zju.edu.cn)) and Linsen Li ([linsenli@sjtu.edu.cn](mailto:linsenli@sjtu.edu.cn))

## Methods

### Material synthesis

The LiCoO<sub>2</sub> samples were synthesized in LiOH-Li<sub>2</sub>SO<sub>4</sub> molten salts using Co<sub>3</sub>O<sub>4</sub> as the cobalt source. In a typical experiment, 0.0033 mole of Co<sub>3</sub>O<sub>4</sub>, 0.015 mole of LiOH, and 0.002 mole of Li<sub>2</sub>SO<sub>4</sub> were manually mixed in an agate mortar and then transferred to an alumina crucible. The powders were heated to 910 °C in air at a ramping rate of ~10 °C min<sup>-1</sup> and then kept at 910 °C for 10 h. During cooling, the powders were slowly cooled down to 300 °C at a rate of 2 °C min<sup>-1</sup> and then naturally cooled to room temperature. The LiCoO<sub>2</sub> samples were separated from the salts by water washing and sonication and dried in an oven at 60 °C. In the doping experiments, a certain amount of dopant was mixed with Co<sub>3</sub>O<sub>4</sub>, LiOH, and Li<sub>2</sub>SO<sub>4</sub> initially while all the other experimental procedures remain the same. Mg(OH)<sub>2</sub>, Al(OH)<sub>3</sub>, TiO<sub>2</sub>, Zr(OH)<sub>4</sub>, Nb<sub>2</sub>O<sub>5</sub>, MoO<sub>3</sub>, and WO<sub>3</sub> were used as the dopants. The LiCoO<sub>2</sub> samples were thermally treated again at 1000 °C for 10 h before they were used for electrochemical testing.

### DFT calculations

In this study, the DFT+U calculations was performed with the open source GPAW package [1, 2] using the real-space projector-augmented wave (PAW) method [3,4]. First, bulk calculation was performed with GGA level Perdew–Burke–Ernzerhof (PBE) exchange-correlation functional [5], with a real space grid spacing of 0.14 Å. Monkhorst Pack scheme was used for sampling the Brillouin zone, with 8 × 8 × 8 k -point mesh. The cutoff force for all calculations was set to below 0.01 eV Å<sup>-1</sup>. The Hubbard *U* value of 2.4 is applied to the *d*-orbitals for Co, which was determined by fitting the experimental bandgap of 2.5 eV for bulk LiCoO<sub>2</sub> [6]. The bulk lattice constants were then calculated as *a* = 2.864 Å and *c* = 14.216 Å, close to the previous reports [6]. Then, the (0001) surface slab was built with 6 layers and a total of 216 atoms, while a vacuum of 5 Å was applied on each side of the slab. For the doped system, one Co atom on each side of the surface was substituted by a dopant atom. Whereas the (10 $\bar{1}$ 4) surface slabs were built with 4 layers and 144 atoms. The k-points were set as 4 × 4 × 1 and the convergence criterial was set to below 0.05 eV Å<sup>-1</sup> for all the surface calculations. The Hubbard *U* value was also applied to the *d* bands for some of the dopants, e.g., 4.0 for Nb [7], 4.0 for Zr [8], 2.5 for Ti [9] and 6.3 for Mo [10], respectively.

### Material characterizations

PXRD measurements were carried out using a poly-functional X-Ray diffractometer powder diffraction (Bruker D8) using Cu K $\alpha$  radiation. SEM micrographs were taken using a Phenom Pro scanning electron microscope at an acceleration voltage of 10 kV. SEM-EDX measurements were made using a TESCAN MAGNA UHR SEM. The particle sizes distribution was measured by a particle size analyzer (Mastersizer2000). TOF-SIMS measurements were made using ION-TOF TOF-SIMS 5-100. A Bi<sup>+</sup> ion beam at 30 keV and 500 pA was used as the primary ion beam to etch the samples with an analysis area of 10 × 10  $\mu$ m<sup>2</sup>.

### Electrochemical measurements

The LCO samples, super P carbon black, and PVDF binder were mixed in N-methyl pyrrolidone at a weight ratio of 90:5:5 to make a slurry, which was coated onto aluminum foil using a film applicator. The as-made electrodes were dried at 120 °C for 10 h under vacuum and cut into discs (10 mm in diameter) for coin cell tests. The typical loading of LCO was around

3–4 mg cm<sup>-2</sup>. Half-cells were assembled using Li foil (450 μm in thickness) as the anode, a polyethylene separator, and 1 M LiPF<sub>6</sub> dissolved in EC-EMC (3/7 by weight) + 2 wt% VC as the electrolyte in an argon-filled glove-box (Mikrona, O<sub>2</sub>/H<sub>2</sub>O < 0.1 ppm).

Artificial graphite (Shanshan) was used as the anode in the full cell tests. The artificial graphite powder, super P carbon black, and PVDF binder were mixed in N-methyl pyrrolidone at a weight ratio of 90:5:5 to make a slurry, which was coated onto copper foil using a film applicator. The graphite electrodes were dried at 80 °C for 10 h under vacuum. The typical loading of graphite was around 5 mg cm<sup>-2</sup> while the LCO cathode loading was around 9 mg cm<sup>-2</sup> for the full cells. The n/p ratio was ~1.08.

Electrochemical cycling measurements were performed using battery cyclers (Shenzhen Neware, BTS4000-5V) in a voltage range of 4.5-3.0 V at various C-rates. The coin cells were cycled inside temperature chambers set at 30 °C for the half cells. For the half-cell tests, the cells were first cycled at 0.1 C for three cycles, then cycled at 0.33 C. A 0.1 C cycle was applied every 20 cycles. For the full cell tests, the cells were first charged at 0.05 C to 4.4 V and then held at this voltage until the current dropped to 0.02 C. Next, the cells were discharged at 0.05 C to 2.9 V. The long-term cycling was carried out at 1 C. The rate capability tests were carried out using half cells. The cells were charged and discharged at the same C-rates ranging from 0.2 C to 20 C. 1 C = 170 mA g<sup>-1</sup> was used in this work.

### Supplementary References

- [S1] J. J. Mortensen, L. B. Hansen, and K. W. Jacobsen, Real-space grid implementation of the projector augmented wave method, *Phys. Rev. B* **71**, 035109 (2005).
- [S2] J. Enkovaara, C. Rostgaard, J. J. Mortensen et al. Electronic structure calculations with GPAW: a real-space implementation of the projector augmented-wave method, *J. Phys.: Condens. Matter* **22**, 253202 (2010).
- [S3] P. E. Blöchl, Projector augmented-wave method, *Phys. Rev. B* **50**, 17953 (1994).
- [S4] P. E. Blöchl, C. J. Först, and J. Schimpl, Projector Augmented Wave Method: ab-initio molecular dynamics with full wave functions, *Bull. Mater. Sci.* **26**, 33 (2003).
- [S5] J. Perdew, M. Ernzerhof, and K. Burke, Rationale for mixing exact exchange with density functional approximations, *J. Chem. Phys.* **105**, 9982 (1996).
- [S6] A. Abbaspour-Tamijani, J. W. Bennett, D. T. Jones, N. Cartagena-Gonzalez, Z. R. Jones, E. D. Laudadio, R. J. Hamers, J. A. Santana, S. E. Mason, DFT and thermodynamics calculations of surface cation release in LiCoO<sub>2</sub>, *Appl. Surf. Sci.* **515**, 145865 (2020).
- [S7] F. Wang and A. M. Rappe, First-principles calculation of the bulk photovoltaic effect in KNbO<sub>3</sub> and (K,Ba)(Ni,Nb)O<sub>3-δ</sub>, *Phys. Rev. B* **91**, 165124 (2015).
- [S8] O. A. Syzgantseva, M. Calatayud, C. Minot, Revealing the Surface Reactivity of Zirconia by Periodic DFT Calculations, *J. Phys. Chem. C* **116**, 6636–6644 (2012).
- [S9] J. Stausholm-Møller, H. H. Kristoffersen, B. Hinnemann, G. K. H. Madsen, and B. Hammer, DFT+U study of defects in bulk rutile TiO<sub>2</sub>, *J. Chem. Phys.* **133**, 144708 (2010).
- [S10] R. Coquet, D. J. Willock, The (010) surface of α-MoO<sub>3</sub>, a DFT + U study, *Phys. Chem. Chem. Phys.* **2005**, 7, 3819-3828.

## Supplementary Figures

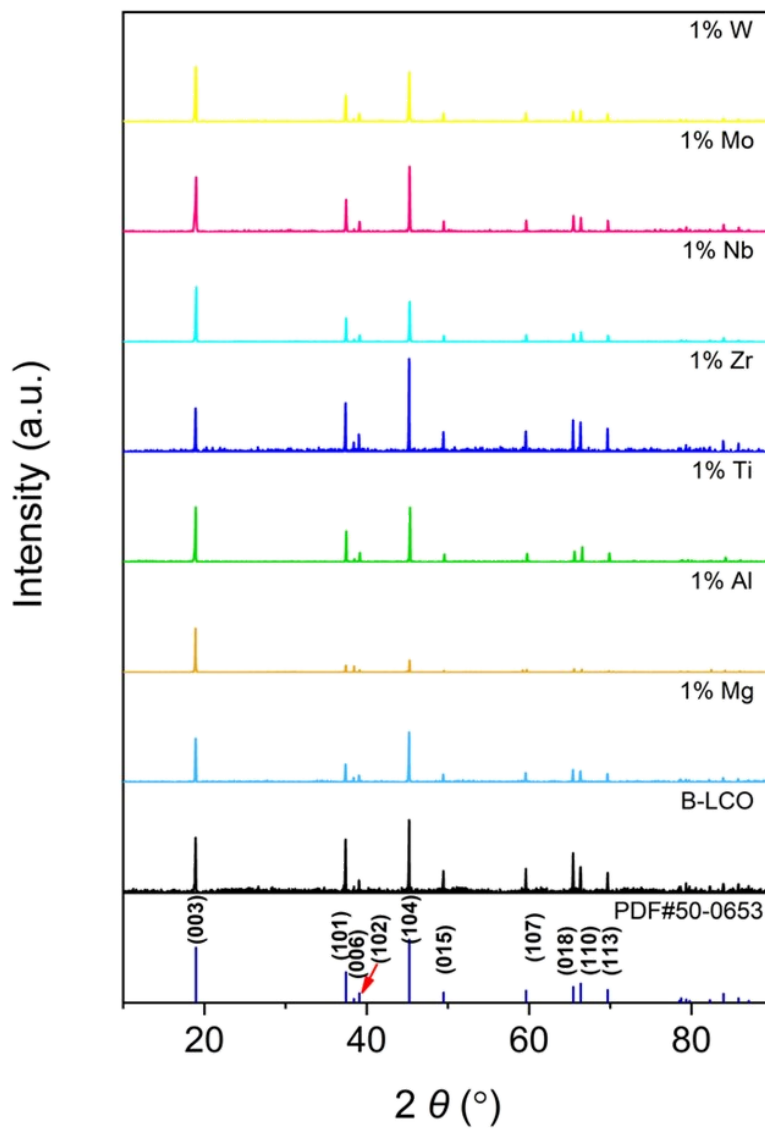

**Supplementary Fig. 1 | Powered X-ray diffraction patterns for the bare and doped LCO samples.** All the patterns could be indexed as hexagonal  $\text{LiCoO}_2$ .

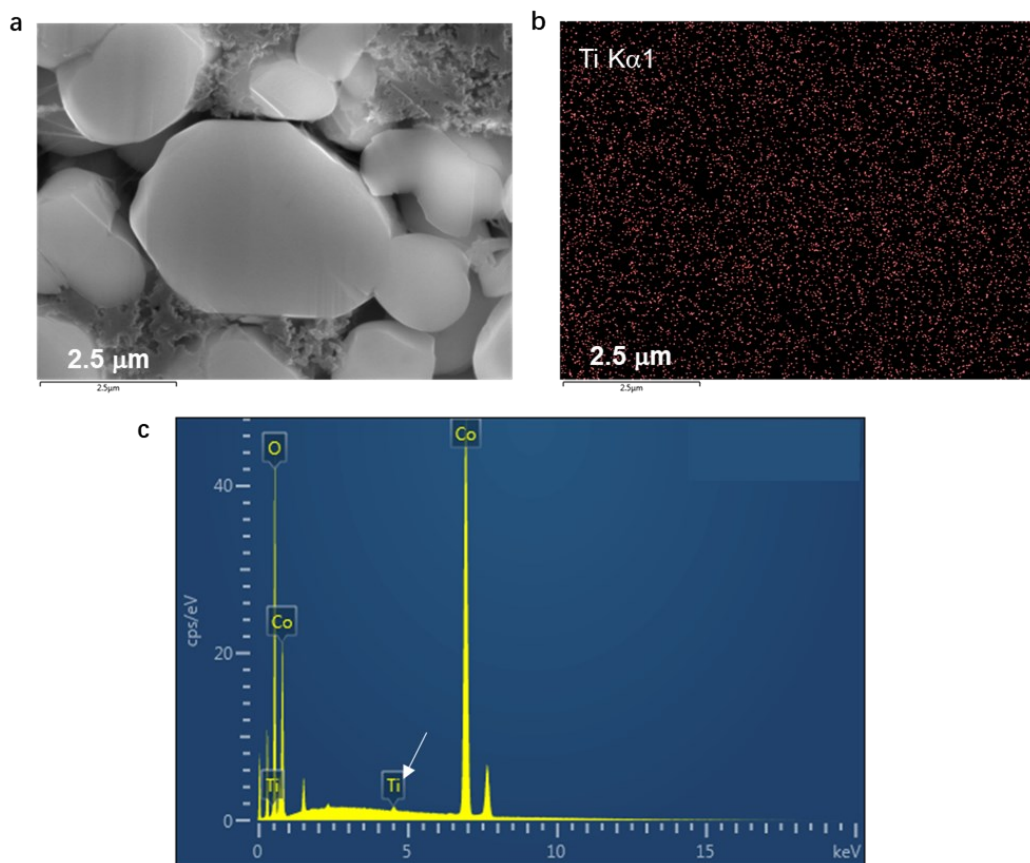

**Supplementary Fig. 2** | (a) Cross-sectional SEM image of the Ti-doped LiCoO<sub>2</sub> sample. The cross section was prepared using ion-milling. (b) and (c) are EDX mapping result of Ti and the corresponding spectrum from this particular region, respectively.

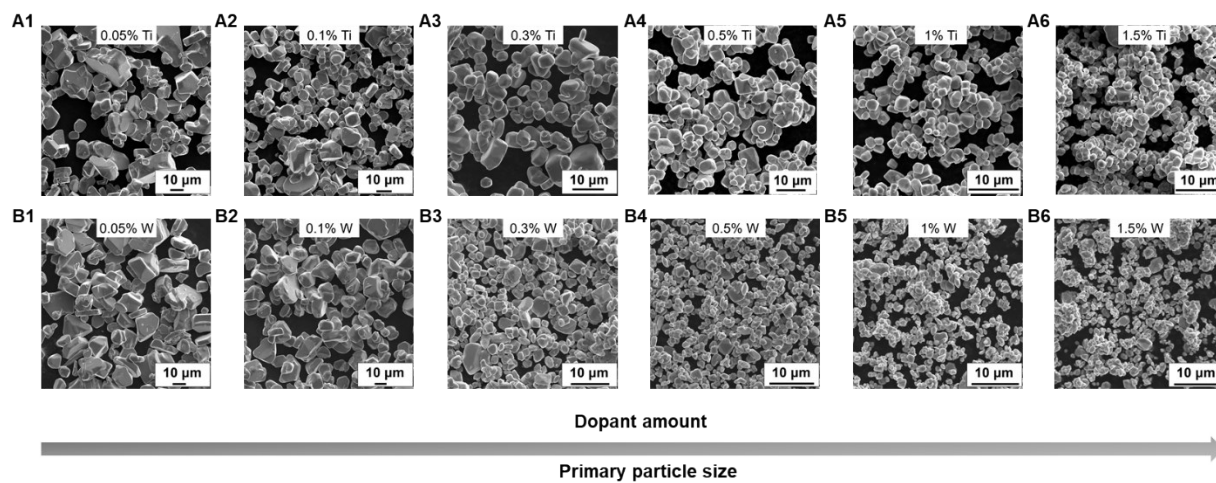

**Supplementary Fig. 3 | SEM micrographs of LCO particles synthesized with Ti or W as the dopant. (A1 to A6) and (B1 to B6) show the gradual reduction of the LCO primary particle size as a function of the dopant concentration for Ti and W (relative to Co mol%), respectively.  $\text{TiO}_2$  and  $\text{WO}_3$  were used.**

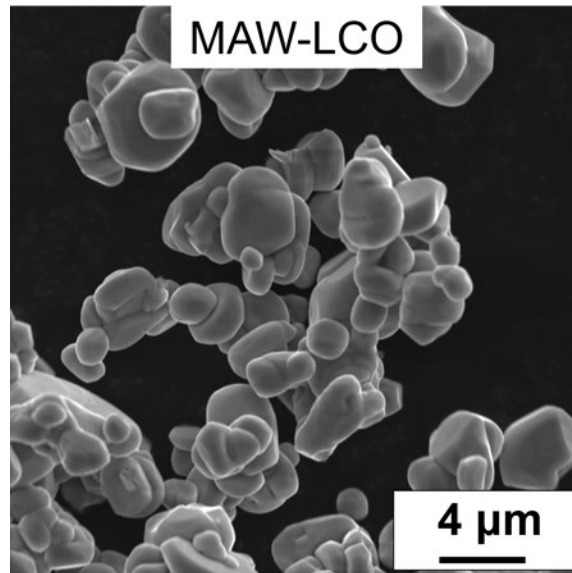

**Supplementary Fig. 4 | SEM micrograph of LCO particles synthesized with Mg, Al, and W as co-dopants.**  $W^{6+}$  ions were also used as the crystal growth mediator. 0.1 wt% of  $Mg(OH)_2$ ,  $Al(OH)_3$ , and  $WO_3$  were added to the molten salt synthesis of  $LiCoO_2$  in  $LiOH-Li_2SO_4$ .

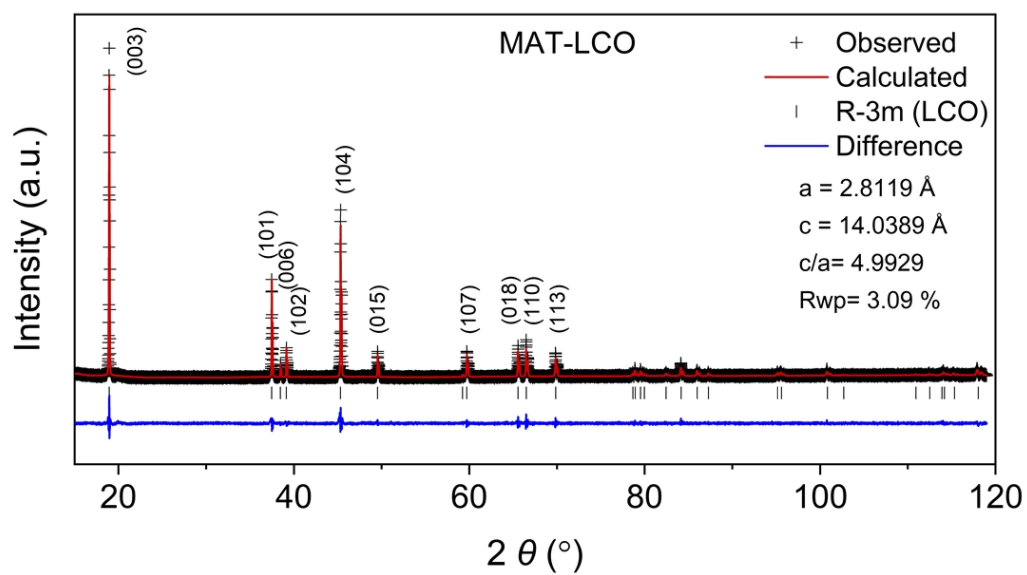

**Supplementary Fig. 5** | Powder X-ray diffraction of the MAT-LCO and the rietveld refinement results.



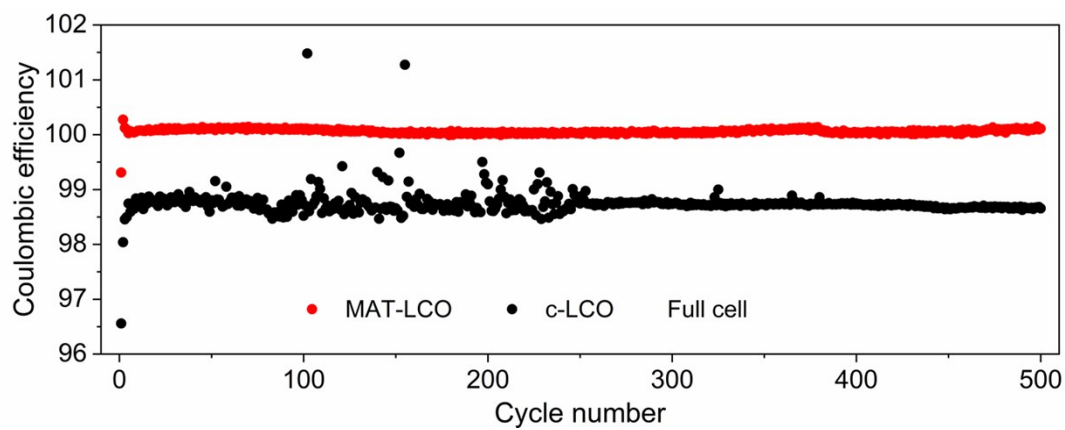

**Supplementary Fig. 6 | Comparison of the coulombic efficiencies of the LCO-graphite full cells cycled in the voltage range of 4.4–2.9 V.**

**Supplementary Table 1****Surface energies for (0001) and (10 $\bar{1}$ 4) LCO surfaces with different dopants (in  $J m^{-2}$ )**

| Dopants                     | Co    | Al    | Mg    | Mo    | Ti    | W     | Nb    | Zr    |
|-----------------------------|-------|-------|-------|-------|-------|-------|-------|-------|
| (0001)<br>surface           | 2.181 | 2.219 | 1.950 | 1.910 | 1.900 | 1.168 | 1.63  | 1.884 |
| (10 $\bar{1}$ 4)<br>surface | 1.111 | 1.064 | 1.037 | 0.953 | 0.966 | 0.906 | 0.978 | 0.945 |
